# Supplementary material for: The HicA toxin from Burkholderia pseudomallei has a role in persister cell formation
Source: PubMed Central journal article supplement (PMC3969222; doi:10.1042/bj20140073), 2014-03-28
Supplement: bj4590333add.pdf [file bj4590333add.pdf]

## SUPPLEMENTARY ONLINE DATA

# The HicA toxin from *Burkholderia pseudomallei* has a role in persister cell formation

Aaron BUTT\*, Victoria A. HIGMAN†, Christopher WILLIAMS†, Matthew P. CRUMP†, Claudia M. HEMSLEY\*, Nicholas HARMER\* and Richard W. TITBALL\*<sup>1</sup>

\*Biosciences, College of Life and Environmental Sciences, University of Exeter, Geoffrey Pope Building, Stocker Road, Exeter EX4 4QD, U.K.

†School of Chemistry, University of Bristol, Cantock's Close, Bristol BS8 1TS, U.K.

**Table S1** NMR assignment, structure calculation and validation statistics

| Parameter                                             | Values           |
|-------------------------------------------------------|------------------|
| Degree of assignment*                                 |                  |
| Backbone (C $\alpha$ , C', N and H <sup>N</sup> ) (%) | 91.2             |
| Side-chain H (%)                                      | 79.4             |
| Side-chain non-H (%)                                  | 39.7             |
| Number of restraints                                  |                  |
| Distance restraints                                   |                  |
| Intra-residue ( $ i - j  = 0$ )                       | 515              |
| Sequential ( $ i - j  = 1$ )                          | 216              |
| Medium range ( $2 \leq  i - j  < 5$ )                 | 109              |
| Long range ( $ i - j  \geq 5$ )                       | 172              |
| Ambiguous                                             | 59               |
| Total                                                 | 1012             |
| Dihedral angle restraints ( $\Phi/\Psi$ )             | 94 (47/47)       |
| Restraint statistics†                                 |                  |
| RMSD of distance violations (Å)                       | 0.019 ± 0.003    |
| RMSD of dihedral violations (°)                       | 0.27             |
| Violations > 0.5 Å                                    | 0                |
| Violations > 0.3 Å                                    | 0                |
| Violations > 0.1 Å                                    | 9.8 ± 2.8        |
| RMSD from idealized covalent geometry†                |                  |
| Bonds (Å)                                             | 0.0031 ± 0.00017 |
| Angles (°)                                            | 0.47 ± 0.0013    |
| Impropers (°)                                         | 1.33 ± 4.97      |
| Structural quality                                    |                  |
| Ramachandran statistics*‡§                            |                  |
| Most favoured regions (%)                             | 84.0/91.2        |
| Allowed regions (%)                                   | 14.2/7.0         |
| Generously allowed regions (%)                        | 1.9/1.8          |
| Disallowed regions (%)                                | 0.0/0.0          |
| CING ROG scores (R/O/G)* [1] (%)                      | 20/22/58         |
| Verify3D Z-score [2]                                  | -2.57            |
| Prosa II Z-score [3]                                  | -0.74            |
| Procheck Z-score ( $\Phi/\Psi$ )‡ [4]                 | -1.14            |
| Procheck Z-score ( $\Phi/\Psi$ )‡ [4]                 | -1.71            |
| MolProbity Z-score [5]                                | -1.57            |
| Number of close contacts                              | 2                |
| Co-ordinates precision (RMSD)*§                       |                  |
| All backbone atoms (Å)                                | 3.2/1.2/0.6      |
| All heavy atoms (Å)                                   | 3.5/1.6/1.4      |

\*Residues 5–59.

†Values reported by ARIA 2.3 [6].

‡Values reported by Procheck [4].

§Ordered residues (5–21, 23–32, 35–39 and 45–58) as calculated by PSVS 1.4 [3].

||Residues in secondary structure (6–12, 16–19, 24–28, 35–39 and 50–58) as determined by DSSP [7].

<sup>1</sup> To whom correspondence should be addressed (email r.w.titball@exeter.ac.uk).

The chemical shifts and structure reported for HicA toxin from *Burkholderia pseudomallei* will appear in the Biological Magnetic Resonance Data Bank (BMRB) under accession number 19464 and in the PDB under code 4C26 respectively.



## REFERENCES

- 1 Doreleijers, J. F., Sousa da Silva, A. W., Krieger, E., Nabuurs, S. B., Spronk, C. A., Stevens, T. J., Vranken, W. F., Vriend, G. and Vuister, G. W. (2012) CING: an integrated residue-based structure validation program suite. *J. Biomol. NMR* **54**, 267–283
- 2 Luthy, R., Bowie, J. U. and Eisenberg, D. (1992) Assessment of protein models with three-dimensional profiles. *Nature* **356**, 83–85
- 3 Bhattacharya, A., Tejero, R. and Montelione, G. T. (2007) Evaluating protein structures determined by structural genomics consortia. *Proteins* **66**, 778–795
- 4 Laskowski, R. A., MacArthur, M. W., Moss, D. S. and Thornton, J. M. (1993) PROCHECK: a program to check the stereochemical quality of protein structures. *J. Appl. Cryst.* **26**, 283–291
- 5 Lovell, S. C., Davis, I. W., Arendall, 3rd, W. B., de Bakker, P. I., Word, J. M., Prisant, M. G., Richardson, J. S. and Richardson, D. C. (2003) Structure validation by  $C\alpha$  geometry:  $\phi$ ,  $\psi$  and  $C\beta$  deviation. *Proteins* **50**, 437–450
- 6 Rieping, W., Habeck, M., Bardiaux, B., Bernard, A., Malliavin, T. E. and Nilges, M. (2007) ARIA2: automated NOE assignment and data integration in NMR structure calculation. *Bioinformatics* **23**, 381–382
- 7 Kabsch, W. and Sander, C. (1983) Dictionary of protein secondary structure: pattern recognition of hydrogen-bonded and geometrical features. *Biopolymers* **22**, 2577–2637

---

Received 20 January 2014; accepted 7 February 2014

Published as BJ Immediate Publication 7 February 2014, doi:10.1042/BJ20140073
